# Supplementary material for: Components of Brachypodium distachyon resistance to nonadapted wheat stripe rust pathogens are simply inherited
Source: PLoS Genet. 2018 Sep 28;14(9):e1007636. doi: 10.1371/journal.pgen.1007636 (PMC6161853; doi:10.1371/journal.pgen.1007636)
Supplement: S3 Table — (XLSX) [file pgen.1007636.s010.xlsx]

## Sheet: Sheet1
					SNPs present in 11 genes at the Yrr1 locus in a panel of Brachypodium accession
	* nucleotide positions are relative to start codon of the gene ORF
gene	*position	ABR2	ABR3	ABR4	ABR5	ABR9	ABR7	ABR8	ABR6	Adi10	Adi12	Adi2	Bd18-1	Bd2-3	Bd21-3	Bd21	Bd3-1	BdTR1i	BdTR2b	BdTR2g	BdTR3c	BdTR5i	BdTR7a	BdTR9k	BdTR10c	BdTR10h	BdTR11a	BdTR11g	BdTR11i	BdTR13a	BdTR13c	BdTR13k	Bis-1	Foz1	Gaz8	Jer1	Kah1	Kah5	Koz1	Luc1	Mig3	Mon3	Per1	Pob1	Sig2	Tek2	Tek4	Uni2
Bradi4g24244.1.v3.1	25	C	C	C	C	C	C	C	C	C	C	C	C	C	C	C	C	C	C	C	C	C	A	C	C	C	C	C	C	C	C	C	N	C	C	C	N	C	C	C	C	C	C	C	C	A	C	C
Bradi4g24244.1.v3.1	739	G	G	G	G	G	G	G	G	G	G	G	G	G	G	G	G	G	G	G	G	G	G	G	G	G	G	G	G	G	G	G	N	G	G	G	G	G	G	G	G	G	G	G	G	C	G	G
Bradi4g24244.1.v3.1	861	C	C	C	C	C	C	C	C	N	C	C	C	C	C	C	C	C	C	C	C	C	C	C	C	C	C	C	C	C	C	C	N	C	C	C	C	C	C	C	C	C	C	C	C	A	C	C
Bradi4g24244.1.v3.1	915	G	G	G	G	G	G	G	G	N	G	G	G	G	G	G	N	G	G	G	G	G	C	G	G	G	G	G	G	G	G	G	N	G	N	G	G	G	G	G	G	G	G	G	G	C	G	G
Bradi4g24244.1.v3.1	1154	G	G	G	G	G	G	G	G	N	G	G	G	G	G	G	N	G	G	G	G	G	C	G	G	G	G	G	G	G	G	N	G	G	N	G	G	G	G	G	G	G	G	G	G	G	G	G
Bradi4g24244.1.v3.1	1157	G	G	G	G	G	G	G	G	N	G	G	G	G	G	G	N	G	G	G	G	G	C	G	G	G	G	G	G	G	G	N	G	G	N	G	G	G	G	G	G	G	G	G	G	G	G	G
Bradi4g24260.1.v3.1	584	A	A	A	A	A	A	A	A	N	A	A	A	A	A	A	N	A	A	A	A	A	C	N	A	A	A	A	A	A	A	A	A	A	N	A	A	A	A	A	A	A	A	A	A	C	A	A
Bradi4g24260.1.v3.1	708	G	G	G	G	G	G	G	G	N	G	G	G	G	G	G	N	G	G	G	G	G	A	G	G	A	G	G	G	G	G	G	G	G	G	G	G	G	G	G	G	G	G	G	G	A	G	G
Bradi4g24260.1.v3.1	833	A	A	A	A	A	A	A	A	A	A	A	A	A	A	A	A	A	A	A	A	A	T	A	A	A	A	A	A	A	A	A	A	A	A	A	A	A	A	A	A	A	A	A	A	T	A	A
Bradi4g24260.1.v3.1	875	T	T	T	T	T	T	T	T	T	T	T	T	T	T	T	T	T	T	T	T	T	C	T	T	T	T	T	T	T	T	T	T	T	T	T	T	T	T	T	T	T	T	T	T	C	T	T
Bradi4g24260.1.v3.1	883	G	G	G	G	A	G	A	G	N	A	A	G	G	G	A	G	G	G	G	G	G	G	A	G	G	G	G	G	G	G	G	G	G	G	G	G	G	G	G	G	G	G	A	G	G	G	G
Bradi4g24260.1.v3.1	1035	T	T	T	T	T	T	T	T	N	T	T	T	T	T	T	T	T	T	T	T	T	C	T	T	T	T	T	T	T	T	T	T	T	T	T	T	T	T	T	T	T	T	T	T	C	T	T
Bradi4g24260.1.v3.1	1081	G	G	G	G	G	G	G	G	A	G	G	A	A	A	G	A	A	A	A	A	A	G	G	A	A	A	A	A	A	A	A	A	G	G	G	A	A	A	G	G	G	A	G	G	G	G	G
Bradi4g24260.1.v3.1	1246	A	A	A	A	A	A	A	A	N	A	A	A	A	A	A	A	A	A	A	A	A	G	A	A	A	A	A	A	A	A	A	A	A	A	A	A	A	A	A	A	A	A	A	A	N	A	A
Bradi4g24270.1.v3.1	62	G	G	G	G	G	G	G	G	N	G	G	G	G	G	G	G	G	G	G	G	G	A	N	G	N	G	G	G	G	G	N	G	G	G	G	N	G	G	G	G	G	G	G	G	G	N	G
Bradi4g24270.1.v3.1	177	A	C	C	C	C	C	C	C	N	N	C	C	C	C	C	N	C	C	C	C	N	C	N	C	N	C	C	C	C	C	N	N	C	C	C	N	C	C	C	C	C	C	C	C	C	C	C
Bradi4g24270.1.v3.1	274	G	G	G	G	G	G	G	G	N	G	G	G	G	G	G	N	G	G	G	G	N	G	N	G	G	G	G	G	G	G	G	N	G	G	G	G	G	G	A	G	G	G	G	G	G	G	G
Bradi4g24270.1.v3.1	428	C	C	A	C	A	A	A	C	N	N	A	C	N	C	A	N	C	C	C	C	N	A	N	N	C	C	C	C	C	N	C	N	C	N	C	N	C	C	A	C	A	N	A	C	A	A	A
Bradi4g24270.1.v3.1	793	T	T	T	T	T	T	T	T	N	T	T	T	T	T	T	N	T	T	T	T	T	T	T	T	T	T	T	T	T	T	T	T	T	T	T	T	T	T	T	T	T	T	T	T	T	C	T
Bradi4g24270.1.v3.1	930	C	C	C	C	T	C	T	C	N	T	T	C	C	C	T	N	C	C	C	C	C	C	T	C	C	C	C	C	C	N	C	C	C	C	C	N	C	C	C	C	C	C	T	C	C	C	C
Bradi4g24270.1.v3.1	1398	G	G	G	G	G	G	G	G	N	G	G	G	G	G	G	N	G	G	G	G	G	A	N	N	G	G	G	G	G	N	G	G	G	N	G	G	G	G	G	G	G	G	G	G	A	G	G
Bradi4g24280.2.v3.1	177	A	A	G	A	A	A	A	A	A	A	A	A	A	A	A	A	A	A	A	A	A	A	N	A	A	A	A	A	A	A	A	A	A	A	A	A	A	A	A	A	G	A	A	A	A	A	A
Bradi4g24280.2.v3.1	930	C	C	T	C	C	C	C	C	C	C	C	C	C	C	C	C	C	C	C	C	C	C	C	C	C	C	C	C	C	C	C	C	C	C	C	C	C	C	C	C	C	C	C	C	C	C	C
Bradi4g24280.2.v3.1	1554	C	C	C	C	C	C	C	C	C	C	C	C	C	C	C	C	C	C	C	C	C	C	C	C	C	C	C	C	C	C	C	C	C	C	C	C	C	C	C	C	C	C	C	C	T	N	C
Bradi4g24280.2.v3.1	1876	G	G	G	G	A	G	G	G	G	G	G	G	G	G	G	G	G	G	G	G	G	G	G	G	G	G	G	G	G	G	G	G	G	G	G	G	G	G	G	G	G	G	G	G	G	G	G
Bradi4g24280.2.v3.1	1987	C	C	C	C	C	C	A	C	A	A	A	A	C	C	A	C	C	C	C	C	C	C	A	C	C	A	C	C	C	A	C	A	C	A	C	A	C	C	C	C	C	C	A	C	C	A	C
Bradi4g24280.2.v3.1	2007	A	G	G	A	G	G	G	A	G	G	G	G	A	A	G	A	A	G	A	A	A	G	G	A	A	G	A	G	A	G	A	G	A	G	G	G	A	A	A	G	G	A	G	A	G	G	G
Bradi4g24280.2.v3.1	2022	G	C	C	G	C	C	C	G	C	C	C	C	G	G	C	G	G	C	G	C	G	C	C	G	G	C	G	C	G	C	G	C	G	C	C	C	G	G	G	C	C	G	C	G	C	C	C
Bradi4g24280.2.v3.1	2066	A	A	A	A	A	A	G	A	A	G	G	A	A	A	G	A	A	A	A	A	A	A	G	A	A	A	A	A	A	A	A	A	A	A	A	A	A	A	A	A	A	A	A	A	A	A	A
Bradi4g24287.1.v3.1	429	G	G	G	G	G	G	G	G	G	G	G	G	G	G	G	G	G	G	G	G	G	G	G	G	G	G	G	G	G	G	G	G	G	G	G	G	G	G	G	G	G	G	G	G	A	G	G
Bradi4g24287.1.v3.1	489	C	C	C	C	C	C	C	C	C	C	C	C	C	C	C	C	C	C	C	C	C	T	C	C	C	C	C	C	C	C	C	C	C	C	C	C	C	C	C	C	C	C	C	C	T	C	C
Bradi4g24297.1.v3.1	4	A	T	T	A	T	A	T	A	A	A	A	A	A	A	T	A	A	A	A	A	A	T	A	A	A	A	A	A	A	A	A	A	A	A	A	A	A	A	A	A	T	A	T	A	T	T	T
Bradi4g24297.1.v3.1	397	A	A	A	A	A	A	A	A	A	A	A	A	A	A	A	A	A	A	A	A	A	A	A	A	A	A	A	A	A	A	A	A	A	A	A	A	A	A	A	A	A	A	A	A	A	A	G
Bradi4g24302.1.v3.1	5	A	G	G	A	G	G	G	A	G	A	A	A	A	A	G	N	A	A	A	A	A	G	A	A	A	A	A	A	A	A	A	A	A	A	A	A	A	A	A	A	G	A	G	A	G	G	G
Bradi4g24302.1.v3.1	70	A	C	C	A	C	C	C	A	N	A	A	A	A	A	C	A	A	A	A	A	A	C	A	A	A	A	A	A	A	A	A	A	A	A	A	A	A	A	A	A	C	A	C	A	C	C	C
Bradi4g24302.1.v3.1	208	C	T	T	C	T	T	T	C	C	C	C	C	C	C	T	C	C	C	C	C	C	T	C	C	C	C	C	C	C	C	C	T	C	C	C	C	C	C	C	C	T	C	T	C	T	T	T
Bradi4g24302.1.v3.1	215	T	A	A	T	A	T	A	T	T	T	T	T	T	T	A	T	T	T	T	T	T	A	T	T	T	T	T	T	T	T	T	T	T	T	T	T	T	T	T	T	A	T	A	T	A	A	A
Bradi4g24302.1.v3.1	271	A	C	C	A	C	A	C	A	A	A	A	A	A	A	C	A	A	A	A	A	A	C	A	A	A	A	A	A	A	A	A	A	A	A	A	A	A	A	A	A	C	A	C	A	C	C	C
Bradi4g24302.1.v3.1	352	A	C	C	A	C	C	C	A	N	A	A	A	A	A	C	A	A	A	A	A	A	C	A	A	A	A	A	A	A	A	A	A	A	A	A	A	A	A	A	A	C	A	C	A	C	C	C
Bradi4g24302.1.v3.1	437	C	T	T	C	T	T	T	C	C	C	C	T	T	C	T	C	C	C	T	C	T	T	C	C	C	T	C	C	C	T	C	T	C	C	C	T	C	C	C	C	T	T	T	C	T	T	T
Bradi4g24302.1.v3.1	440	C	C	C	T	C	C	C	T	C	C	C	C	C	C	C	C	C	C	C	C	C	C	C	C	C	C	C	C	C	C	C	C	T	C	T	C	C	C	C	T	C	C	C	T	C	C	C
Bradi4g24302.1.v3.1	510	G	A	A	G	A	G	A	G	G	G	G	G	G	G	A	G	G	G	G	G	G	A	G	G	G	G	G	G	G	G	G	G	G	G	G	G	G	G	G	G	A	G	A	G	A	A	G
Bradi4g24302.1.v3.1	540	G	A	A	G	A	A	A	G	G	G	G	G	G	G	A	G	G	G	G	G	G	A	G	G	G	G	G	G	G	G	G	G	G	G	G	G	G	G	G	G	A	G	A	G	A	A	A
Bradi4g24302.1.v3.1	547	T	G	G	T	T	T	T	T	T	T	T	T	T	T	T	T	T	T	T	T	T	T	T	T	T	T	T	T	T	T	T	T	T	T	T	T	T	T	T	T	G	T	T	T	T	T	T
Bradi4g24302.1.v3.1	570	G	A	A	G	A	A	A	G	G	G	G	G	G	G	A	G	G	G	G	G	G	A	G	G	G	G	G	G	G	G	G	G	G	G	G	G	G	G	G	G	A	G	A	G	A	A	A
Bradi4g24302.1.v3.1	573	C	T	T	C	T	T	T	C	C	C	C	C	C	C	T	C	C	C	C	C	C	T	C	C	C	C	C	C	C	C	C	C	C	C	C	C	C	C	C	C	T	C	T	C	T	T	T
Bradi4g24302.1.v3.1	578	G	A	A	G	A	G	A	G	G	G	G	G	G	G	A	G	G	G	G	G	G	A	G	G	G	G	G	G	G	G	G	G	G	G	G	G	G	G	G	G	A	G	A	G	A	A	G
Bradi4g24302.1.v3.1	581	G	G	G	G	G	G	G	G	G	G	G	G	G	G	G	G	G	G	G	G	G	G	G	G	G	G	G	G	G	G	G	G	G	G	G	G	G	G	G	G	G	A	G	G	G	G	G
Bradi4g24302.1.v3.1	663	T	A	A	T	A	A	A	T	N	T	T	T	T	T	A	T	T	T	T	T	T	A	T	T	T	T	T	T	T	T	T	T	T	T	T	T	T	T	T	T	A	T	A	T	A	A	A
Bradi4g24302.1.v3.1	693	G	A	A	G	A	G	A	G	N	G	G	G	G	G	A	G	G	G	G	G	G	A	G	G	G	G	G	G	G	G	G	G	G	G	G	G	G	G	G	G	A	G	A	G	A	A	G
Bradi4g24302.1.v3.1	755	C	C	C	C	C	C	C	C	C	C	C	C	C	C	C	C	C	C	C	C	C	C	C	C	C	C	C	C	C	C	C	C	C	C	C	C	C	C	C	C	C	G	C	C	C	C	C
Bradi4g24302.1.v3.1	817	G	A	A	G	A	A	A	G	G	G	G	G	G	G	A	G	G	G	G	G	G	A	G	G	G	G	G	G	G	G	G	G	G	G	G	N	G	G	G	G	A	G	A	G	A	A	A
Bradi4g24302.1.v3.1	1091	T	T	T	T	T	T	T	T	T	T	T	T	T	T	T	T	T	T	T	T	T	T	T	T	T	T	T	T	T	T	T	T	T	T	T	N	T	T	T	T	T	A	T	T	T	T	T
Bradi4g24302.1.v3.1	1140	A	A	A	A	A	A	A	A	A	A	A	A	A	A	A	A	A	A	A	A	A	A	N	A	A	A	A	A	A	A	A	A	A	A	A	N	A	A	G	A	A	C	A	A	A	A	A
Bradi4g24302.1.v3.1	1198	G	A	A	G	A	G	A	G	G	G	G	G	G	G	A	G	G	G	G	G	G	A	N	G	G	G	G	G	G	G	G	G	G	G	G	G	G	G	G	G	A	G	A	G	A	A	A
Bradi4g24302.1.v3.1	1391	C	T	T	C	C	C	C	C	C	C	C	C	C	C	C	C	C	C	C	C	C	C	C	C	C	C	C	C	C	C	C	C	C	C	C	N	C	C	C	C	T	C	C	C	C	C	C
Bradi4g24302.1.v3.1	1558	C	G	G	C	G	G	G	C	C	C	C	C	C	C	G	C	C	C	C	C	C	G	C	C	C	N	C	C	C	C	C	C	C	C	C	N	C	C	C	C	G	C	G	C	G	G	G
Bradi4g24302.1.v3.1	1572	T	T	T	T	T	T	T	T	T	T	T	T	T	T	T	T	T	T	T	T	T	T	T	T	T	N	T	T	T	T	T	T	T	T	T	N	T	T	G	T	T	T	T	T	T	T	T
Bradi4g24302.1.v3.1	1640	C	G	G	C	G	C	G	C	C	C	C	C	C	C	G	C	C	C	C	C	C	G	C	C	C	C	C	C	C	C	C	C	C	C	C	N	C	C	C	C	G	C	G	C	G	G	G
Bradi4g24302.1.v3.1	1693	G	A	A	G	G	G	G	G	G	G	G	G	G	G	G	G	G	G	G	G	G	G	G	G	G	G	G	G	G	G	G	G	G	G	G	N	G	G	G	G	A	G	G	G	G	G	G
Bradi4g24302.1.v3.1	1793	G	G	G	G	G	G	A	G	G	G	G	G	G	G	A	G	G	G	G	G	G	G	G	G	G	G	G	G	G	G	G	G	G	G	G	N	G	G	G	G	G	G	G	G	G	G	G
Bradi4g24302.1.v3.1	1851	C	T	T	C	C	C	C	C	C	C	C	C	C	C	C	C	C	C	C	C	C	C	C	C	C	C	C	C	C	C	C	C	C	C	C	C	C	C	C	C	T	C	C	C	C	C	C
Bradi4g24302.1.v3.1	1874	A	C	C	A	C	C	C	A	A	A	A	A	A	A	C	A	A	A	A	A	A	C	A	A	A	A	A	A	A	A	A	A	A	A	A	A	A	A	A	A	C	A	C	A	C	C	C
Bradi4g24302.1.v3.1	1888	G	T	T	G	T	T	T	G	G	G	G	G	G	G	T	G	G	G	G	G	G	T	G	G	G	G	G	G	G	G	G	G	G	G	G	G	G	G	G	G	T	G	T	G	T	T	T
Bradi4g24310.1.v3.1	552	A	G	G	A	G	A	G	A	A	A	A	A	A	A	G	A	A	A	A	A	A	G	A	A	A	A	A	A	A	A	A	A	A	A	A	A	A	A	A	A	G	G	G	A	G	G	G
Bradi4g24310.1.v3.1	597	G	A	A	G	A	G	A	G	G	G	G	G	G	G	A	G	G	G	G	G	G	A	G	G	G	G	G	G	G	G	G	G	G	G	G	G	G	G	G	G	A	G	A	G	A	A	A
Bradi4g24310.1.v3.1	1166	A	G	G	A	A	A	A	A	A	A	A	A	A	A	A	A	A	A	A	A	A	A	A	A	A	A	A	A	A	A	A	A	A	A	A	A	A	A	A	A	G	A	A	A	A	A	A
Bradi4g24310.1.v3.1	1390	T	T	G	T	T	T	T	T	T	T	T	T	T	T	T	T	T	T	T	T	T	T	T	T	T	T	T	T	T	T	T	T	T	T	T	T	T	T	T	T	T	T	T	T	T	T	T
Bradi4g24310.1.v3.1	1399	T	T	T	T	T	T	T	T	T	T	T	T	T	T	T	T	T	T	T	T	T	G	T	T	T	T	T	T	T	T	T	T	T	T	T	T	T	T	T	T	T	T	T	T	T	T	T
Bradi4g24310.1.v3.1	1563	C	C	C	C	C	C	T	C	N	C	C	C	C	C	T	C	C	C	C	C	C	C	C	C	C	C	C	C	C	C	C	C	C	C	C	C	C	C	C	C	C	C	T	C	C	C	C
Bradi4g24310.1.v3.1	1702	G	A	A	G	A	G	A	G	G	G	G	G	G	G	A	G	G	G	G	G	G	A	G	G	G	G	G	G	G	G	G	G	G	G	G	G	G	G	G	G	A	G	A	G	A	A	G
Bradi4g24310.1.v3.1	1756	A	T	T	A	A	A	A	A	A	A	A	A	A	A	A	A	A	A	A	A	A	A	A	A	A	A	A	A	A	A	A	A	A	A	A	A	A	A	A	A	T	A	A	A	A	A	A
Bradi4g24310.1.v3.1	1859	C	G	G	C	C	C	C	C	C	C	C	C	C	C	C	C	C	C	C	C	C	C	C	C	C	C	C	C	C	C	C	C	C	C	C	C	C	C	C	C	G	C	C	C	C	C	C
Bradi4g24310.1.v3.1	1956	G	G	G	G	G	G	C	G	G	G	G	G	G	G	C	G	G	G	G	G	G	G	G	G	G	G	G	G	G	G	G	G	G	G	G	N	G	G	G	G	G	G	G	G	G	G	G
Bradi4g24310.1.v3.1	2270	G	G	G	G	G	G	G	G	G	G	G	G	G	G	G	G	G	G	G	G	G	G	G	G	G	G	G	G	G	G	G	G	G	G	G	G	G	G	G	G	G	T	G	G	G	G	G
Bradi4g24310.1.v3.1	2361	G	C	C	G	C	G	C	G	G	G	G	G	G	G	C	G	G	G	G	G	G	C	G	G	G	G	G	G	G	G	G	G	G	C	G	C	G	G	G	G	C	G	C	G	C	C	G
Bradi4g24310.1.v3.1	2410	A	G	G	A	G	A	G	A	A	A	A	A	A	A	G	A	A	A	A	A	A	G	A	A	A	A	A	A	A	A	A	A	A	A	A	A	A	A	A	A	G	A	G	A	G	G	G
Bradi4g24310.1.v3.1	2417	C	C	C	C	T	C	C	C	C	C	C	C	C	C	C	C	C	C	C	C	C	C	C	C	C	C	C	C	C	C	C	C	C	C	C	C	C	C	C	C	C	C	C	C	C	C	C
Bradi4g24310.1.v3.1	2470	C	A	A	C	A	C	A	C	C	C	C	C	C	C	A	C	C	C	C	C	C	A	C	C	C	C	C	C	C	C	C	C	C	C	C	C	C	C	C	C	A	C	A	C	A	A	C
Bradi4g24310.1.v3.1	2544	C	C	C	C	C	C	C	C	C	C	C	C	C	C	C	C	C	C	C	C	C	C	C	C	C	C	C	C	C	C	C	C	C	C	C	C	C	C	C	C	C	C	C	C	T	C	C
Bradi4g24310.1.v3.1	2551	C	T	T	C	T	C	T	C	C	C	C	C	C	C	T	C	C	C	C	C	C	T	C	C	C	C	C	C	C	C	C	C	C	C	C	C	C	C	C	C	T	C	T	C	T	T	C
Bradi4g24310.1.v3.1	2592	T	G	G	T	G	G	G	T	T	T	T	T	T	T	G	T	T	T	T	T	T	G	T	T	T	T	T	T	T	T	T	T	T	T	T	T	T	T	T	T	G	T	G	T	G	G	G
Bradi4g24315.1.v3.1	29	G	A	A	G	A	G	A	G	G	A	A	G	A	A	A	G	A	A	G	A	G	A	A	G	G	A	A	A	A	A	G	A	G	A	G	G	G	A	G	G	A	G	A	G	G	G	G
Bradi4g24315.1.v3.1	37	G	G	G	G	G	G	G	G	G	G	G	G	G	G	G	G	G	G	G	G	G	G	G	G	G	G	G	G	G	G	G	G	G	G	G	G	G	G	G	G	G	G	G	G	G	G	C
Bradi4g24315.1.v3.1	162	T	T	T	T	T	T	T	T	T	T	T	T	T	T	T	T	T	T	T	T	T	T	T	T	T	T	T	T	T	T	T	T	T	T	T	T	T	T	T	T	T	T	T	T	T	T	C
Bradi4g24315.1.v3.1	283	G	A	A	G	A	G	A	G	G	G	G	G	G	G	A	G	G	G	G	G	G	A	G	G	G	G	G	G	G	G	G	G	G	G	G	G	G	G	G	G	A	G	A	G	G	G	G
Bradi4g24315.1.v3.1	418	T	T	C	T	C	T	C	C	C	C	C	C	C	C	T	C	C	C	C	C	C	C	C	C	C	C	C	C	C	C	C	C	T	C	T	C	C	C	C	C	C	C	C	T	C	C	C
Bradi4g24315.1.v3.1	524	C	C	C	C	C	C	T	C	C	C	C	C	C	C	C	C	C	C	C	C	C	C	C	C	C	C	C	C	C	C	T	C	C	C	C	C	C	C	C	C	C	C	C	C	C	T	T
Bradi4g24320.1.v3.1	30	T	C	C	T	C	T	C	T	N	N	T	T	T	T	C	N	T	T	T	T	T	C	T	N	T	T	T	T	T	N	T	T	T	N	T	T	T	T	T	T	C	T	C	T	C	C	C
Bradi4g24320.1.v3.1	141	C	T	T	C	T	C	T	C	N	C	C	C	C	C	T	N	C	C	C	C	C	C	N	C	C	C	C	C	C	C	C	C	C	C	C	T	C	C	C	C	T	C	T	C	T	T	C
Bradi4g24320.1.v3.1	185	T	A	A	T	A	A	A	T	N	T	T	T	T	T	A	N	T	T	T	T	T	A	T	T	T	T	T	T	T	T	T	T	T	T	T	T	T	T	A	T	A	T	A	T	A	A	A
Bradi4g24320.1.v3.1	440	C	C	C	C	C	C	C	C	C	C	C	C	C	C	C	C	C	C	C	C	C	C	C	C	C	C	C	C	C	C	C	C	C	C	C	C	C	C	C	C	C	C	C	C	T	C	C
Bradi4g24320.1.v3.1	793	T	C	C	T	C	T	C	T	T	T	T	T	T	T	C	T	T	T	T	T	T	C	T	T	T	T	T	T	T	T	T	T	T	T	T	N	T	T	T	T	C	T	C	T	C	C	C
Bradi4g24320.1.v3.1	1655	T	A	A	T	A	A	A	T	T	T	T	T	T	T	A	T	T	T	T	T	T	A	T	T	T	T	T	T	T	T	T	T	T	T	T	T	T	T	A	T	A	T	A	T	A	A	A
Bradi4g24333.1.v3.1	29	C	C	C	C	C	C	C	C	C	C	C	C	C	C	C	C	C	C	C	C	C	C	C	C	C	C	C	C	C	C	C	C	C	C	C	C	C	C	T	C	C	C	C	C	C	C	C
Bradi4g24333.1.v3.1	36	C	T	T	C	T	C	T	C	C	C	C	C	C	C	T	C	C	C	C	C	C	T	C	C	C	C	C	C	C	C	C	C	C	C	C	C	C	C	T	C	T	C	T	C	T	T	C
Bradi4g24333.1.v3.1	59	G	G	G	G	A	G	G	G	G	G	G	G	G	G	G	G	G	G	G	G	G	G	G	G	G	G	G	G	G	G	G	G	G	G	G	G	G	G	G	G	G	G	G	G	G	A	G
Bradi4g24333.1.v3.1	66	C	G	G	C	G	C	G	C	C	C	C	C	C	C	G	C	C	C	C	C	C	G	C	C	C	C	C	C	C	C	C	C	C	C	C	C	C	C	C	C	G	C	G	C	G	G	C
Bradi4g24333.1.v3.1	86	T	T	T	A	T	T	T	A	T	T	T	T	T	T	T	T	T	T	T	T	T	T	T	T	T	T	T	T	T	T	T	T	A	T	A	T	T	T	T	A	T	T	T	A	T	T	A
Bradi4g24333.1.v3.1	98	C	T	T	C	T	C	T	C	C	C	C	C	C	C	T	C	C	C	C	C	C	T	C	C	C	C	C	C	C	C	C	C	C	C	C	C	C	C	C	C	T	C	T	C	T	T	C
Bradi4g24333.1.v3.1	202	G	G	G	G	G	G	C	G	G	G	G	G	G	G	C	G	G	G	G	G	G	C	G	G	G	G	G	G	G	G	G	G	G	G	G	G	G	G	G	G	G	G	G	G	G	G	G
Bradi4g24333.1.v3.1	221	G	G	G	G	G	G	G	G	G	G	G	G	G	G	G	G	G	G	G	G	G	G	G	G	G	G	G	G	G	G	G	G	G	G	G	G	G	G	T	G	G	G	G	G	G	G	G
Bradi4g24333.1.v3.1	276	G	G	G	G	G	G	A	G	G	G	G	G	G	G	A	G	G	G	G	G	G	A	G	G	G	G	G	G	G	G	G	G	G	G	G	G	G	G	G	G	G	G	G	G	G	G	G
Bradi4g24333.1.v3.1	277	T	C	C	T	T	T	T	T	T	T	T	T	T	T	T	T	T	T	T	T	T	T	T	T	T	T	T	T	T	T	T	T	T	T	T	T	T	T	T	T	C	T	T	T	T	T	T
